# Supplementary material for: Optimizing electromagnetic wave absorption in electrospun carbon-based fibers through dielectric and magnetic component modulation
Source: Royal Society of Chemistry journal article supplement (doi:10.1039/d4qi02776k), 2024-12-11
Supplement: d4qi02776k1.pdf [file d4qi02776k1.pdf]

## **Optimizing Electromagnetic Wave Absorption in Electrospun Carbon-based Fibers through Dielectric and Magnetic Component Modulation**

*Yuchao Wang<sup>1</sup>∇, Yunlong Liu<sup>1</sup>∇, Shenglin Yuan<sup>1</sup>, Hui Huang<sup>1,2</sup>, Zhijun Wu<sup>1</sup>, Lijia Xu<sup>1</sup>, Yongpeng Zhao<sup>1</sup> \**

<sup>1</sup> *College of Mechanical and Electrical Engineering, Sichuan Agricultural University, Ya'an 625014, China*

<sup>2</sup> *School of Physics, Dalian University of Technology, Dalian, Liaoning 116024, China.*

\*Authors to whom correspondence should be addressed: (Yongpeng Zhao) [zhaoyp@sicau.edu.cn](mailto:zhaoyp@sicau.edu.cn)

∇Yuchao Wang and Yunlong Liu contributed equally to this work.

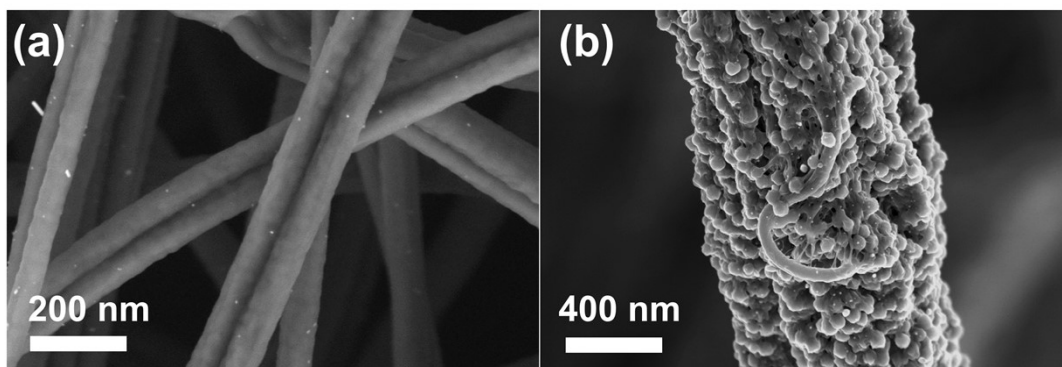

**Figure S1.** SEM images of (a) Carbon nanofibers and (b) CNTs embedded in composite carbon nanofibers.

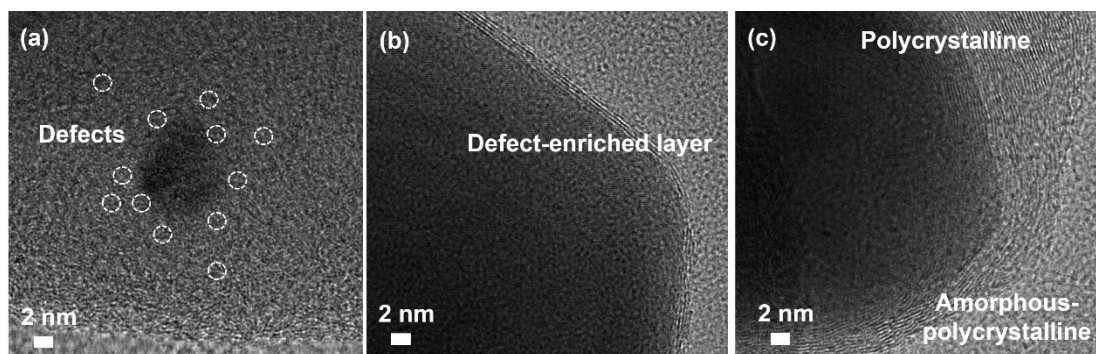

**Figure S2.** (a-b) HRTEM image of Ni-CNT/CNFs(7).

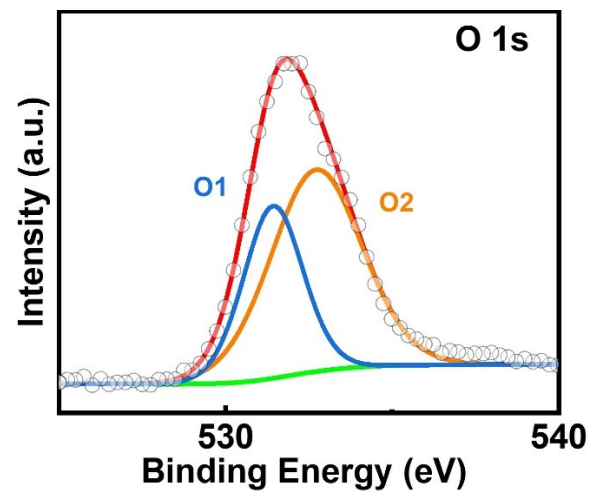

Figure S3. O 1s XPS spectra of Ni-CNT/CNFs(7).

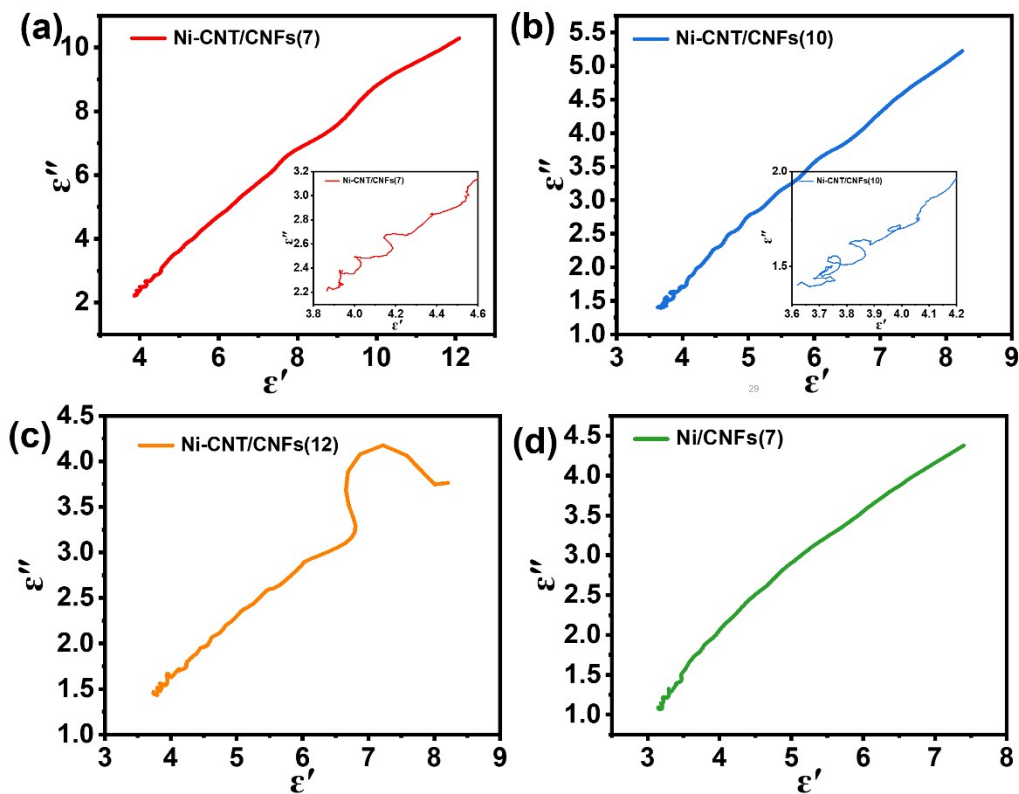

**Figure S4.** Cole–Cole graphs of (a) Ni-CNT/CNFs(7) , (b) Ni-CNT/CNFs(10), (c) Ni-CNT/CNFs(12) and (d) Ni /CNFs(7).

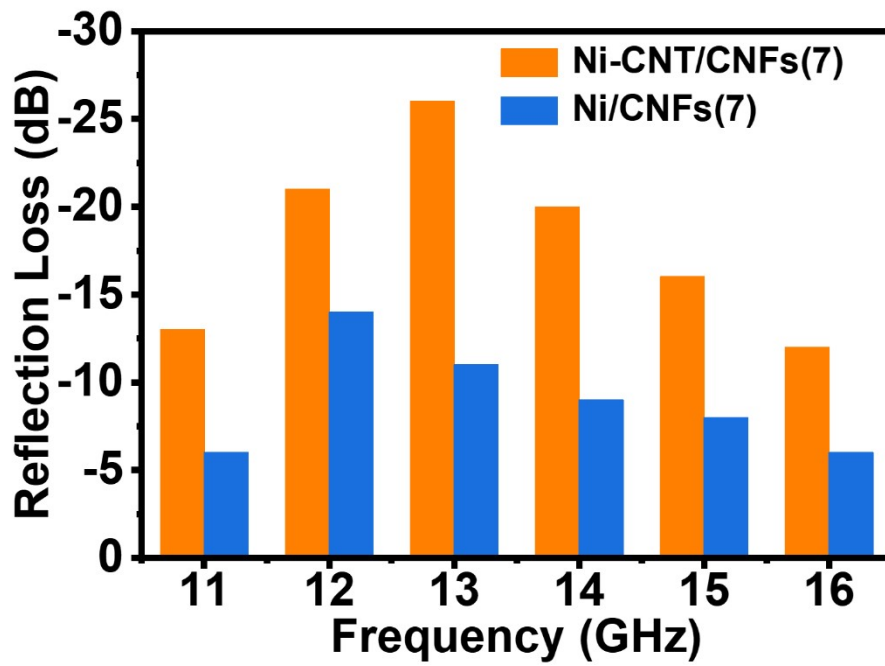

**Figure S5.** Comparisons of RL value of Ni/CNFs(7) compared to Ni-CNT/CNFs(7) at the same thicknesses.

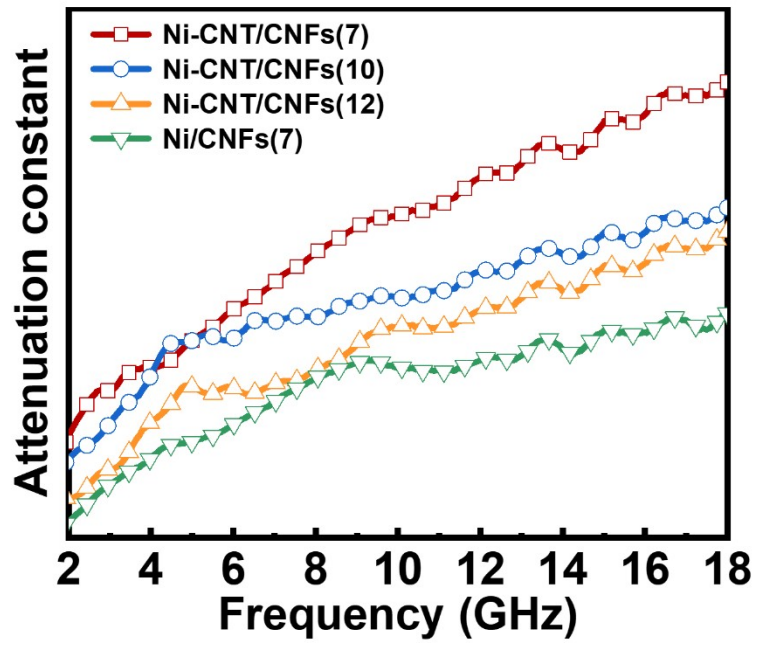

Figure S6. Attenuation constant diagram of the sample.

**Table S1.** Comparison of EMW absorption properties of carbon nanofibers prepared by electrospinning

| Samples                                     | Filling<br>Raotio<br>( wt%) | Minimum RL at low frequency |                               |                                | Ref       |
|---------------------------------------------|-----------------------------|-----------------------------|-------------------------------|--------------------------------|-----------|
|                                             |                             | RL <sub>min</sub> (dB)      | Matching<br>thickness<br>(mm) | Matching<br>frequency<br>(GHz) |           |
| Ni/MnO-CNFs                                 | 15                          | -53.23                      | 2.30                          | 6.50                           | [1]       |
| Fe <sub>0.64</sub> Ni <sub>0.36</sub> @CNFs | 50                          | -34.21                      | 4.00                          | 5.00                           | [2]       |
| Fe <sub>2</sub> O <sub>3</sub> / CNFs       | 20                          | -38.10                      | 2.30                          | 4.20                           | [3]       |
| Fe/Co-CNFs                                  | 50                          | -38.10                      | 2.50                          | 4.10                           | [4]       |
| Co-Fe@C/SiO <sub>2</sub> NFs                | 30                          | -59.60                      | 1.43                          | 4.60                           | [5]       |
| C <sub>f</sub> @FeS <sub>2</sub>            | 20                          | -54.11                      | 1.98                          | 6.04                           | [6]       |
| CF@PPy@CoFe <sub>2</sub> O <sub>4</sub>     | 20                          | -55.33                      | 2.42                          | 6.48                           | [7]       |
| Ni-CNT/CNFs(7)                              | 15                          | -69.20                      | 2.90                          | 7.30                           | This work |

- [1] LIU Y, ZENG Z, ZHENG S, et al. Facile manufacturing of Ni/MnO nanoparticle embedded carbon nanocomposite fibers for electromagnetic wave absorption [J]. 2022, 235: 109800.
- [2] GUO Z, SHI T, YU S, et al. In situ assembly of well-dispersed Fe<sub>0.64</sub>Ni<sub>0.36</sub> nanoparticles on electro-spun carbon nanofibers (CNFs) for efficient microwave absorption [J]. 2024, 59(4): 1380-97.
- [3] XU J, LU N, YUAN M, et al. Rational design of hollow rice-grained  $\alpha$ -Fe<sub>2</sub>O<sub>3</sub>/carbon nanofibers with optimized impedance matching for electromagnetic wave absorption enhanced [J]. 2023, 16(4): 5676-84.
- [4] GUO S, ZHANG Y, CHEN J, et al. The excellent electromagnetic wave absorbing properties of carbon fiber composites: the effect of metal content [J]. 2022, 9(13): 3244-50.
- [5] ZHANG Z, ZHAO Y, LI Z, et al. Synthesis of carbon/SiO<sub>2</sub> core-sheath nanofibers with Co-Fe nanoparticles embedded in via electrospinning for high-performance microwave absorption [J]. 2022: 1-12.
- [6] GUO Y, ZHANG M, CHENG T, et al. Enhancing electromagnetic wave absorption in carbon fiber using FeS<sub>2</sub> nanoparticles [J]. 2023, 16(7): 9591-601.
- [7] YUAN L, ZHAO W, MIAO Y, et al. Constructing core-shell carbon fiber/polypyrrole/CoFe<sub>2</sub>O<sub>4</sub> nanocomposite with optimized conductive loss and polarization loss toward efficient electromagnetic absorption [J]. 2024, 7(2): 70.



### **Corrosion Resistance Test**

In our study, we used the CHI760E electrochemical workstation (Shanghai Chenhua Instrument Co., Ltd.) to measure the polarization kinetic potential curve and electrochemical impedance spectroscopy (EIS) of the materials, in order to evaluate the samples' antioxidation and corrosion resistance. The specific experimental conditions are as follows:

Using a three-electrode setup, we examined the electrochemical characteristics of every sample. Each of the compounds was employed straight as a working electrode, whereas Ag/AgCl and Pt served as reference and counter electrodes, respectively. All tests were conducted using a 3.5 wt% NaCl electrolyte solution. All experiments occurred under ambient conditions.
